# Supplementary material for: In-depth characterization of a novel live-attenuated Mayaro virus vaccine candidate using an immunocompetent mouse model of Mayaro disease
Source: PubMed Central journal article supplement (PMC7093544; doi:10.1038/s41598-020-62084-x), 2020-03-24

## SUPPLEMENTARY INFORMATION

**In-depth characterization of a novel live-attenuated Mayaro virus vaccine candidate using an immunocompetent mouse model of Mayaro disease**

**Mânlio Tasso de Oliveira Mota<sup>1#</sup>; Vivian Vasconcelos Costa<sup>2#\*</sup>**; Michelle Amantéa Sugimoto<sup>2</sup>; Georgia de Freitas Guimarães<sup>1</sup>, Celso Martins Queiroz-Junior<sup>2</sup>; Thaiané Pinto Moreira<sup>2</sup>; Carla Daiane de Sousa<sup>2</sup>; Franciele Martins Santos<sup>2</sup>, Victoria Fulgêncio Queiroz<sup>2</sup>; Ingedy Passos<sup>2</sup>; Josy Hubner<sup>2</sup>; Danielle Gloria Souza<sup>2</sup>; Scott C. Weaver<sup>3</sup>; Mauro Martins Teixeira<sup>2</sup>; **Maurício Lacerda Nogueira<sup>1\*</sup>**.

**Supplementary Table 1.** PRNT<sub>50</sub> in the sera of mice inoculated with MAYV/IRES strain

|               | <b>d.p.i.</b> |          |          |           |           |
|---------------|---------------|----------|----------|-----------|-----------|
| <b>Animal</b> | <b>3</b>      | <b>5</b> | <b>7</b> | <b>14</b> | <b>21</b> |
| <b>1</b>      | 1:20          | 1:320    | 1:40     | 1:320     | >1:640    |
| <b>2</b>      | <1:20         | >1:640   | 1:40     | 1:320     | >1:640    |
| <b>3</b>      | <1:20         | 1:320    | 1:80     | 1:320     | >1:640    |
| <b>4</b>      | <1:20         | 1:320    | 1:80     | >1:640    | >1:640    |
| <b>5</b>      | 1:20          | 1:160    | 1:80     | >1:640    | >1:640    |

d.p.i. = days post-infection.

**Supplementary Table 2.** PRNT<sub>50</sub> in *pool* of MAYV/IRES inoculated mice sera

|              | <b>d.p.i.</b> |          |          |           |           |
|--------------|---------------|----------|----------|-----------|-----------|
|              | <b>3</b>      | <b>5</b> | <b>7</b> | <b>14</b> | <b>21</b> |
| <b>MAYV</b>  | >1:320        | >1:320   | 1:40     | >1:320    | >1:320    |
| <b>CHIKV</b> | 1:160         | 1:160    | 1:160    | 1:160     | 1:160     |

## Supplementary legends

**Figure S1: Characterization of MAYV disease in immunocompetent mice.** 6-week-old BALB/c mice were inoculated or not with MAYV ( $2 \times 10^5$  PFU/50  $\mu$ L, i.pl.) and hind paw histopathological analyses was performed along the kinetic of infection. Figure S1A shows semi-quantitative analysis of hind paw sections of control and MAYV-infected mice, 1, 3, 7, 14 and 21 d.p.i. (Scale Bar - 100  $\mu$ m). The images presented are representative of an animal on each day. Results were expressed as mean  $\pm$  SEM and are representative of two experiments. \*  $p < 0.05$  when compared to control uninfected mice (MOCK), as assessed by one-way ANOVA followed by Newman-Keuls post-test.

**Figure S2: Serum cytokine levels in MAYV-infected immunocompetent mice.** 6-week-old BALB/c mice were inoculated or not with MAYV ( $2 \times 10^5$  PFU/50  $\mu$ L, i.pl.) and serum analyses of pro-inflammatory cytokines were performed along the kinetic of infection. Levels of: A) IL1- $\beta$ , B) TNF- $\alpha$  and C) IL-6 in the serum of MOCK- and MAYV-infected mice. Results are expressed as pg/mL of serum. Data is representative of two experiments expressed as mean  $\pm$  SEM. \* $p < 0.05$  when compared to control uninfected mice (MOCK), as assessed by Mann-Whitney test.

**Figure S3: wt MAYV or MAYV/IRES injection is not associated with knee joint histopathological changes.** 6-week-old BALB/c mice were inoculated MAYV ( $2 \times 10^5$  PFU/50  $\mu$ L, i.pl.) and knee histopathological analysis was performed along the kinetic of infection. Figure S3A shows semi-quantitative analysis of knee joint sections of MOCK- and MAYV-infected mice, 1, 3, 7, 14 and 21 days after infection (Scale Bar - 100  $\mu$ m). The images presented are representative of an animal on each day. Results were expressed as mean  $\pm$  SEM and are representative of two experiments. \*  $p < 0.05$  when compared to control uninfected mice (MOCK), as assessed by one-way ANOVA followed by Newman-Keuls post-test.

**Figure S4: Gating strategy for accumulation and activation of leukocytes in the spleen wt MAYV and MAYV/IRES vaccinated mice.** Splenocytes from wt MAYV or MAYV/IRES vaccinated mice were obtained and incubated with Brefeldin A for 5h prior to staining. After exclusion of debris, and duplets, splenocytes were gated into CD11c<sup>+</sup> (DC), CD11c<sup>+</sup>F4/80<sup>+</sup> (monocytes/macrophages), CD4<sup>+</sup> (T CD4) and CD4<sup>+</sup>CD8<sup>+</sup> (T CD8) populations. Each population was expressed as mean  $\pm$  SEM percentage of single cells. Activation of splenic DCs and monocytes/macrophages were measured by the expression of CD86, CD11b, and intracellular TNF- $\alpha$ , expressed as mean fluorescence intensity (MFI)  $\pm$  SEM. T CD4 lymphocytes were further gated to investigate the production of intracellular IL-17A (Th17) and the expression of the Treg markers CD25 and Foxp3. Th17 and Treg population were expressed as percentage of T CD4<sup>+</sup> cells  $\pm$  SEM. T CD8 lymphocyte activation was determined by the expression of CD44, expressed as percentage of T CD8 cells positive for this marker.

# Supplementary Figure 1

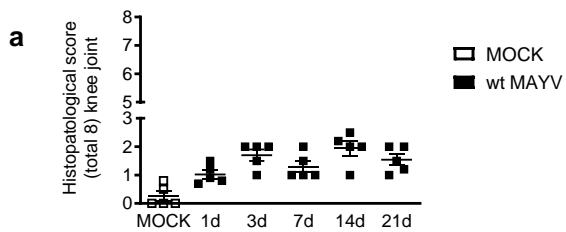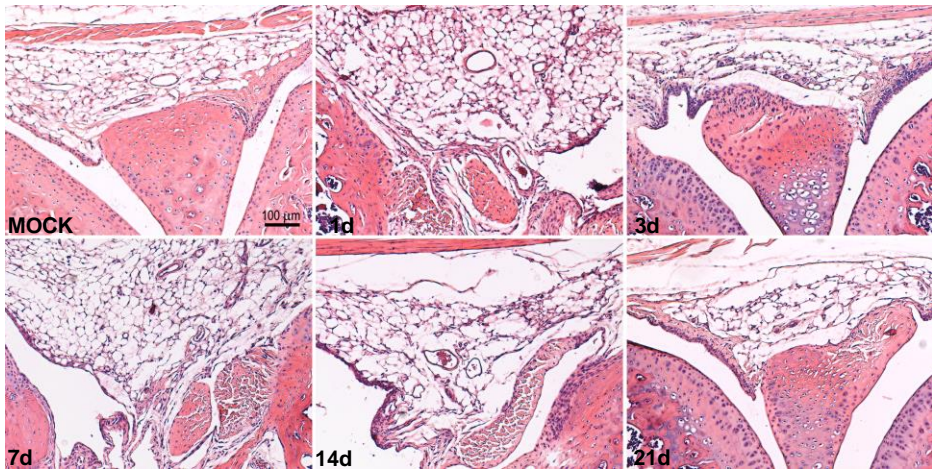

## Supplementary Figure 2

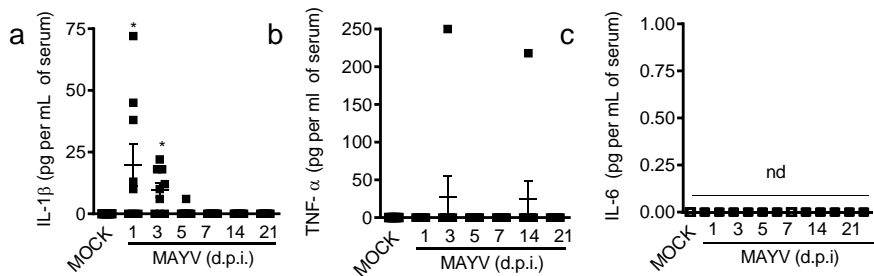

### Supplementary Figure 3

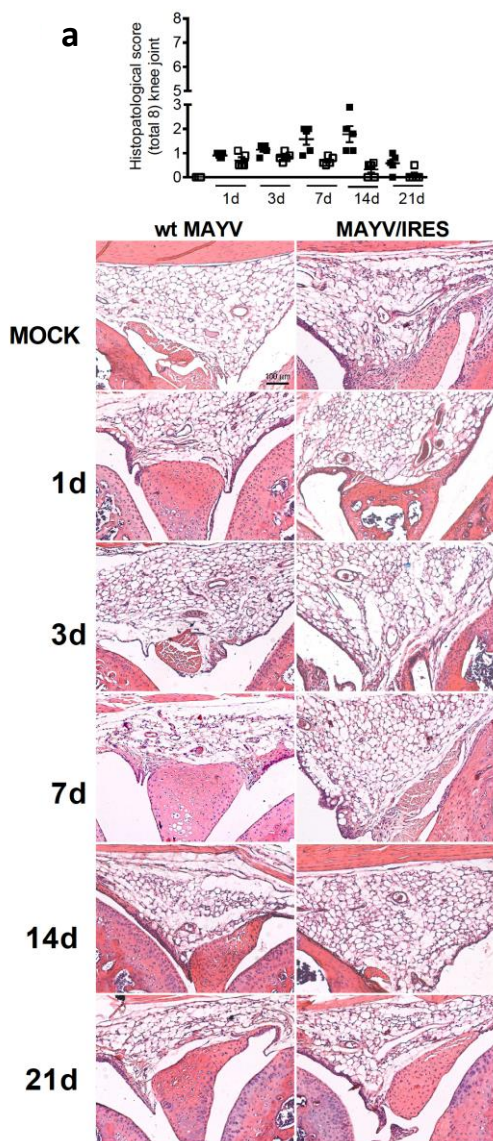

# Supplementary Figure 4

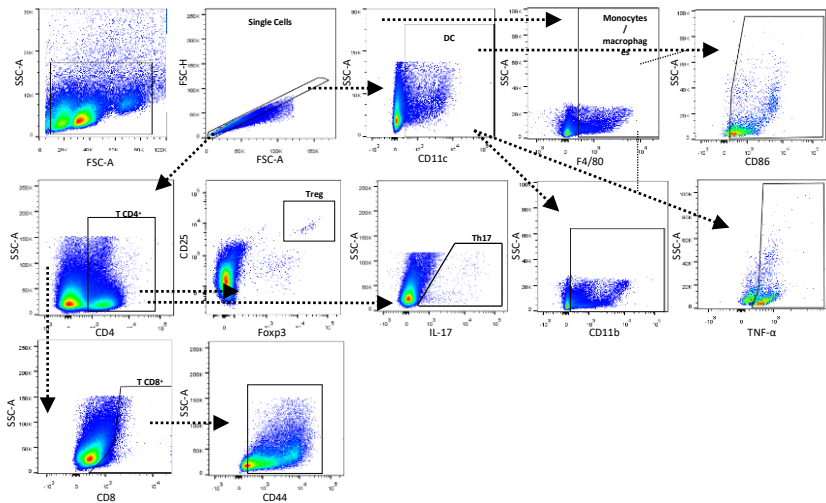

Supplement: 41598_2020_62084_MOESM1_ESM.pdf [file 41598_2020_62084_MOESM1_ESM.pdf]
